# Supplementary material for: Unraveling molecular mechanisms of β-glucuronidase inhibition by flavonoids from Centaurea scoparia: integrated in silico and in vitro insights
Source: Royal Society of Chemistry journal article supplement (doi:10.1039/d4nj02393e), 2024-01-01
Supplement: d4nj02393e1.pdf [file d4nj02393e1.pdf]

# Unraveling Molecular Mechanisms of $\beta$ -glucuronidase Inhibition by Flavonoids from *Centaurea scoparia*: Integrated *in silico* and *in vitro* insights

Maha A. Alwaili <sup>a</sup>, Faris F. Aba Alkhayl<sup>b</sup>, Hassan A. Rudayni <sup>c</sup>, Ahmed A. Allam <sup>c,d</sup>,

Naif G. Altoona <sup>e</sup>, Al Mokhtar Lamsabhi <sup>f,g</sup>, Emadeldin M. Kamel <sup>h\*</sup>

<sup>a</sup> Department of Biology, College of Science, Princess Nourah bint Abdulrahman University,  
P.O. BOX 84428, Riyadh 11671, Saudi Arabia

<sup>b</sup> Department of Medical Laboratories, College of Applied Medical Sciences, Qassim  
University, 51452 Buraydah, Saudi Arabia.

<sup>c</sup> Department of Biology, College of Science, Imam Mohammad Ibn Saud Islamic University,  
Riyadh 11623, Saudi Arabia

<sup>d</sup> Department of Zoology, Faculty of Science, Beni-suef University, Beni-suef 65211 Egypt.

<sup>e</sup> Department of Biology, King Khalid Military Academy, Riyadh 11459, Saudi Arabia

<sup>f</sup> Departamento de Química, Módulo 13, Universidad Autónoma de Madrid, Campus de  
Excelencia UAM-CSIC Cantoblanco, 28049 Madrid, Spain

<sup>g</sup> Institute for Advanced Research in Chemical Sciences (IAdChem), Universidad Autónoma  
de Madrid, 28049 Madrid, Spain

<sup>h</sup> Chemistry Department, Faculty of Science, Beni-Suef University, Beni-Suef 62514, Egypt

## Contents

|                                                                                                               |   |
|---------------------------------------------------------------------------------------------------------------|---|
| Cartesian coordinates of the optimized geometries of isolated phenolics at the B3LYP level of DFT theory..... | 2 |
| The optimized geometries of isolated phytochemicals at the B3LYP level of theory.....                         | 8 |
| Molecular Docking data.....                                                                                   | 8 |

**Cartesian coordinates of DFT-calculated isolated phenolics at the B3LYP level of theory**  
**2'-hydroxychrysin (1)**

|   |          |          |          |
|---|----------|----------|----------|
| C | -5.81028 | -1.92477 | 0.00026  |
| C | -4.43748 | -1.92477 | 0.00026  |
| C | -3.71554 | -0.69965 | 0.00026  |
| C | -4.43341 | 0.52422  | 0.00063  |
| C | -5.85483 | 0.49485  | 0.00079  |
| C | -6.52633 | -0.70313 | 0.0005   |
| C | -2.29381 | -0.6701  | 0.       |
| H | -6.40207 | 1.4493   | 0.00087  |
| C | -2.3378  | 1.74901  | 0.00048  |
| C | -1.62179 | 0.52712  | 0.00002  |
| O | -3.71066 | 1.74895  | 0.00075  |
| O | -1.58246 | -1.91062 | 0.00003  |
| O | -3.70348 | -3.15202 | -0.00003 |
| O | -7.95592 | -0.73741 | 0.00063  |
| H | -8.25413 | -1.64991 | 0.00416  |
| H | -2.76245 | -2.96207 | 0.00001  |
| C | -1.5528  | 3.07392  | 0.00023  |
| C | -2.23677 | 4.28993  | 0.00067  |
| C | -0.15806 | 3.05829  | -0.00033 |
| C | -1.52607 | 5.48998  | -0.00013 |
| C | 0.553    | 4.25863  | -0.00013 |
| H | 0.38117  | 2.09998  | -0.0005  |
| C | -0.13073 | 5.47437  | -0.00017 |
| H | -2.06511 | 6.44849  | -0.00041 |
| H | 1.65269  | 4.24599  | -0.00016 |
| H | 0.42941  | 6.4207   | -0.00074 |
| O | -3.66668 | 4.30551  | 0.00023  |
| H | -3.9768  | 5.21368  | -0.02537 |
| H | -6.35572 | -2.84531 | 0.00019  |
| O | -0.19185 | 0.54039  | -0.00043 |
| H | 0.13488  | -0.11361 | 0.62176  |

**Jaceosidin (2)**

|   |          |          |          |
|---|----------|----------|----------|
| C | 4.15356  | -0.25876 | -0.12101 |
| C | 3.33787  | 0.86513  | -0.22919 |
| C | 1.93066  | 0.7225   | -0.19368 |
| C | 1.4314   | -0.58826 | -0.07671 |
| C | 2.23888  | -1.72092 | -0.00983 |
| C | 3.61452  | -1.54772 | -0.03754 |
| C | 0.98303  | 1.85821  | -0.27881 |
| H | 1.80322  | -2.70781 | 0.05721  |
| C | -0.82233 | 0.1709   | -0.12775 |
| C | -0.42014 | 1.45478  | -0.25749 |
| O | 0.08663  | -0.84281 | -0.03246 |
| O | 1.31568  | 3.0327   | -0.36313 |
| O | 4.43889  | -2.6233  | 0.01841  |
| H | 5.33073  | -2.30852 | -0.18545 |
| C | -2.20758 | -0.32043 | -0.08495 |
| C | -2.49058 | -1.68028 | -0.24588 |

|   |          |          |          |
|---|----------|----------|----------|
| C | -3.27622 | 0.57718  | 0.11321  |
| C | -3.80325 | -2.14377 | -0.22447 |
| C | -4.57945 | 0.11531  | 0.13299  |
| C | -4.85448 | -1.25851 | -0.0378  |
| O | 5.5369   | -0.10423 | -0.14432 |
| H | -1.68021 | -2.37934 | -0.39579 |
| C | 6.11808  | 0.08736  | 1.16544  |
| H | 5.9185   | -0.77513 | 1.8074   |
| H | 7.19148  | 0.19333  | 1.01113  |
| H | 5.72033  | 0.98954  | 1.63782  |
| O | 3.9127   | 2.0785   | -0.36631 |
| H | 4.85323  | 1.91947  | -0.53214 |
| H | -1.14167 | 2.25231  | -0.35968 |
| O | -6.13398 | -1.70411 | -0.01311 |
| H | -6.70401 | -0.93571 | 0.12866  |
| H | -3.07538 | 1.62763  | 0.26656  |
| O | -5.70407 | 0.87717  | 0.32037  |
| C | -5.55409 | 2.28127  | 0.5001   |
| H | -6.56083 | 2.67765  | 0.61818  |
| H | -4.96736 | 2.50397  | 1.39724  |
| H | -5.08059 | 2.74236  | -0.37275 |
| H | -4.02886 | -3.19513 | -0.35375 |

### 5,7,4',5'-tetrahydroxy-6,3'-dimethoxyflavone (3)

|   |          |          |          |
|---|----------|----------|----------|
| C | -4.32489 | 0.32103  | -0.11074 |
| C | -3.56686 | -0.83892 | -0.25108 |
| C | -2.15424 | -0.76861 | -0.21031 |
| C | -1.59007 | 0.51152  | -0.0546  |
| C | -2.33938 | 1.68117  | 0.04423  |
| C | -3.72191 | 1.57845  | 0.01009  |
| C | -1.26528 | -1.94751 | -0.32837 |
| H | -1.85387 | 2.64207  | 0.14027  |
| C | 0.6214   | -0.35864 | -0.12338 |
| C | 0.15676  | -1.61597 | -0.2938  |
| O | -0.23437 | 0.69625  | -0.0002  |
| O | -1.65592 | -3.10086 | -0.44801 |
| O | -4.49144 | 2.6919   | 0.09606  |
| H | -5.39731 | 2.42856  | -0.11861 |
| C | 2.03223  | 0.05811  | -0.06263 |
| C | 2.37079  | 1.40678  | -0.20895 |
| C | 3.04259  | -0.90089 | 0.13799  |
| C | 3.70439  | 1.80331  | -0.16995 |
| C | 4.36973  | -0.49833 | 0.17314  |
| C | 4.70507  | 0.8524   | 0.01808  |
| O | -5.71418 | 0.23697  | -0.13951 |
| H | 1.61031  | 2.15869  | -0.36052 |
| C | -6.3069  | 0.0384   | 1.164    |
| H | -6.06703 | 0.87237  | 1.82942  |
| H | -7.38386 | -0.01095 | 1.00596  |
| H | -5.95448 | -0.8946  | 1.61187  |
| O | -4.20193 | -2.01727 | -0.42397 |
| H | -5.13276 | -1.80591 | -0.58607 |
| H | 0.83875  | -2.4442  | -0.42023 |
| O | 6.0018   | 1.28371  | 0.05134  |
| H | 6.56441  | 0.51018  | 0.18947  |
| H | 2.78512  | -1.93903 | 0.28371  |

|   |         |          |          |
|---|---------|----------|----------|
| O | 5.4593  | -1.30859 | 0.36307  |
| C | 5.24418 | -2.70723 | 0.525    |
| H | 6.23115 | -3.14986 | 0.64581  |
| H | 4.64096 | -2.91306 | 1.41494  |
| H | 4.75722 | -3.13574 | -0.35671 |
| O | 4.02539 | 3.11718  | -0.31926 |
| H | 4.98657 | 3.19661  | -0.26778 |

#### 5,4'-dihydroxy-6,7-dimethoxyflavone (4)

|   |          |          |          |
|---|----------|----------|----------|
| C | 3.44532  | -0.05771 | 0.15725  |
| C | 2.64244  | 1.0835   | 0.17634  |
| C | 1.22795  | 0.96067  | 0.11827  |
| C | 0.67101  | -0.31948 | 0.05483  |
| C | 1.44727  | -1.47022 | 0.03007  |
| C | 2.83871  | -1.33162 | 0.0702   |
| C | 0.36515  | 2.13185  | 0.14985  |
| H | 0.96187  | -2.43223 | -0.03218 |
| C | -1.52754 | 0.57851  | 0.03267  |
| C | -1.05229 | 1.84824  | 0.11211  |
| O | -0.68998 | -0.49304 | 0.0049   |
| O | 0.81908  | 3.29092  | 0.21362  |
| C | -2.94188 | 0.18164  | -0.01589 |
| C | -3.32736 | -1.14103 | 0.26063  |
| C | -3.9446  | 1.10786  | -0.33634 |
| C | -4.65887 | -1.5216  | 0.2332   |
| C | -5.28001 | 0.73478  | -0.36726 |
| H | -3.68358 | 2.12903  | -0.58371 |
| C | -5.64609 | -0.58373 | -0.07963 |
| H | -6.04022 | 1.46606  | -0.62475 |
| O | 4.80394  | 0.0236   | 0.27432  |
| H | -2.57013 | -1.87299 | 0.5064   |
| H | -1.72806 | 2.68898  | 0.16783  |
| O | 3.21804  | 2.29126  | 0.25082  |
| O | -6.93708 | -1.01046 | -0.09374 |
| H | -7.51835 | -0.27554 | -0.31665 |
| H | 2.47616  | 2.95194  | 0.25567  |
| H | -4.95611 | -2.53938 | 0.4534   |
| O | 3.69872  | -2.37421 | 0.03461  |
| C | 3.171    | -3.69429 | -0.01313 |
| H | 2.58121  | -3.85796 | -0.92147 |
| H | 4.03583  | -4.35485 | -0.02049 |
| H | 2.55659  | -3.91014 | 0.86718  |
| C | 5.49155  | 0.53027  | -0.87623 |
| H | 5.18989  | 1.55743  | -1.09361 |
| H | 6.55196  | 0.50621  | -0.62664 |
| H | 5.3107   | -0.10693 | -1.74881 |

The optimized geometries of isolated phytochemicals at the B3LYP level of theory

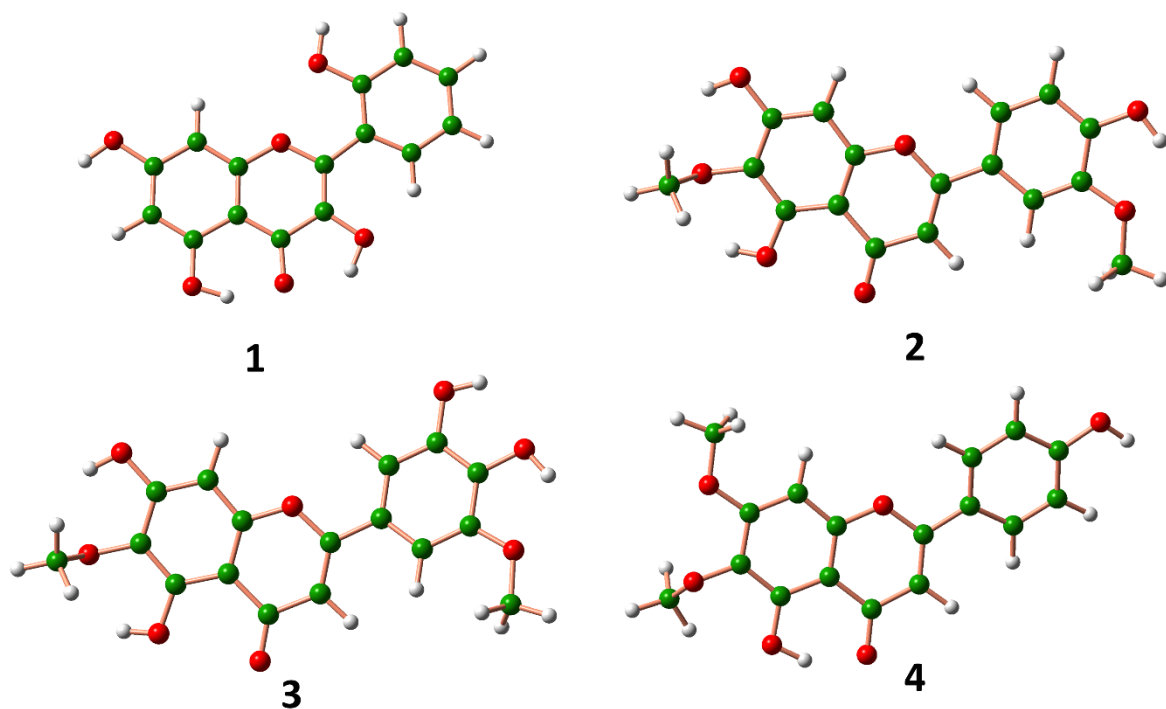

Figure S1. DFT optimized geometries of isolated phenolics at the B3LYP level of theory.

### Molecular docking data

The dimensions of the grid box are center\_x = -26.061, center\_y = -23.252, and center\_z = 1.935; size\_x = 34, size\_y = 38, and size\_z = 30

### Molecular docking results of EGCG with $\beta$ -glucuronidase

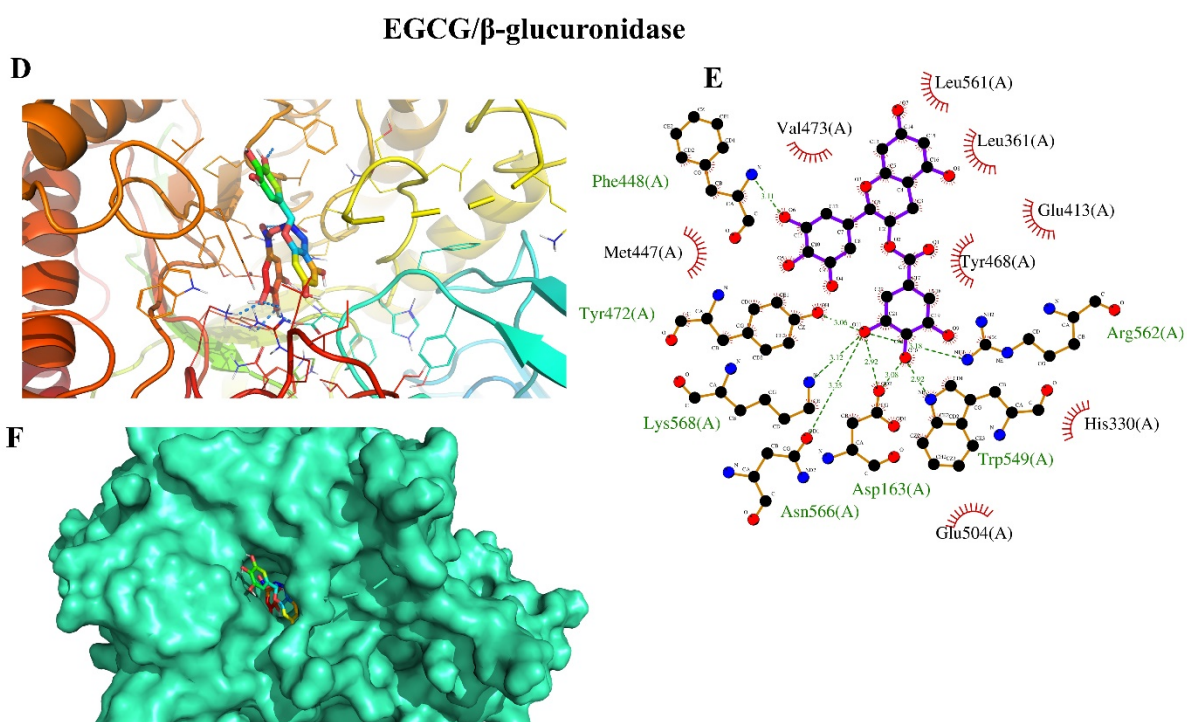

Figure S2. Results of Molecular docking analysis of the reference drug EGCG

### Molecular docking results of the native ligand with $\beta$ -glucuronidase

#### D-Glucaro-delta-lactam/ $\beta$ -glucuronidase

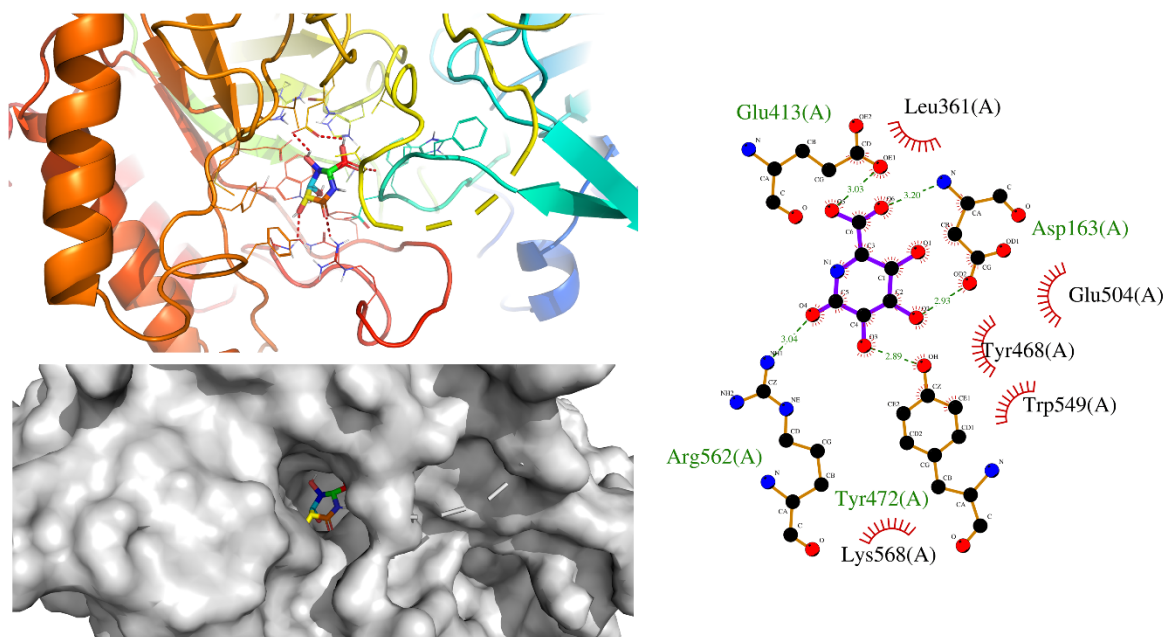

Figure S3. Results of Molecular docking analysis of the PDB native drug with  $\beta$ -glucuronidase (binding affinity of -6.7 kcal/mol)

The purity of the tested compounds was confirmed using PC, TLC, and NMR spectral data.
